# Supplementary material for: Inhibition of Immunoglobulin E Attenuates Pulmonary Hypertension
Source: Research Square preprint supplement (doi:10.21203/rs.3.rs-1036422/v1), 2021-11-04
Supplement: Supplementary file 1 [file 86fe45206e0234fa9d4fa683.docx]

**SUPPLEMENTARY MATERIAL**

**Inhibition of Immunoglobulin E Attenuates Pulmonary Hypertension**

Ting Shu, MD, PhD 1,†, Ying Liu, PhD2,† , Yitian Zhou, BS1, 3,†, Zhou Zhou, MD, PhD4,†, Peiran Yang, PhD2, Jinqiu Li, BS2, Yanjiang Xing, PhD2, Xiaomin Song, MS1, Bolun Li, BS1, Junling Pang, PhD1, Xin Ning, BS1, Xianmei Qi, MS2, Changming Xiong, MD, PhD5, Hang Yang, MD3, Qianlong Chen, MD3, Jingyu Chen, MD, PhD6, Ying Yu, MD,PhD7, Jing Wang, MD, PhD1,*, Chen Wang, MD, PhD2,*

**Supplementary Materials and Methods**

**Supplementary Table 1-2**

**Supplementary Figures and Legends 1-6**

**Supplementary Materials and Methods**

**Animal experiments**

*Fcer1a*-/- (knockout, KO) mice (background C57BL/6) were purchased from The Jackson Laboratory, Bar Harbor, ME. C57BL/6 (wildtype, WT) mice were purchased from Beijing Vital River Laboratory Animal Technology Co., Ltd. *Fcer1aflox/flox* (Biocytogen, China) and *Mcpt5*-*Cre* mice (Biocytogen, China) were crossbred to generate *Fcer1aflox/flox*-*Mcpt5*Cre/+ and *Fcer1aflox/flox*-*Mcpt5*+/+ mice, which were then crossbred to generate MCs-specific *Fcer1a* knockout (MCKO) mice (*Fcer1a*MC-/-, abbreviation for *Fcer1aflox/flox-McptCre/+*) and control *Fcer1aflox/flox*-*Mcpt+/+*mice.

Both mouse and rat models of PH were used in this study. Animals were randomly divided into the different treatment groups for each experiment.

For the hypoxia-induced mouse PH model, 8- to 10-week-old male mice weighing 25-30 g were randomly assigned to normoxia (room air) and normobaric hypoxia (10% O2, in an airtight plexiglass chamber, China Innovation Instrument) for 4 weeks.

For the monocrotaline (MCT)-induced rat PH model, 200 g male Sprague Dawley rats were randomly divided, subcutaneously injected with 60 mg/kg body weight MCT (C2401, sigma) or saline of the same volume, and housed in room air for 4 weeks.

For anti-IgE antibody-treated mouse model, 8- to 10-week-old male WT mice weighing 25-30g were randomly assigned to anti-IgE or isotype control treatment under normoxia or hypoxia exposure. Anti-IgE antibody (553416, BD) was injected via tail vein, 2 μg/dose/mouse, every week, total 4 doses for each mouse. The isotype control antibody (IgG isotype, 555839, BD) was injected in the same manner (tail vein, 2 μg/dose/mouse, every week, total 4 doses). The first dose was injected the day before hypoxia or normoxia exposure.

For anti-IgE antibody-treated rat model, 200 g male Sprague Dawley rats were randomly assigned to anti-IgE or isotype control treatment following saline or MCT injection. The first dose was injected the day before MCT/saline injection. Anti-IgE antibody (553914, BD) was injected via tail vein, 16 μg/dose/rat, every week, total 4 doses for each rat. The isotype control antibody (IgG isotype, 554121, BD) was injected in the same manner (tail vein, 16 μg/dose/rat, every week, total 4 doses).

For the Omalizumab treatment model, 200 g male Sprague Dawley rats were randomly assigned to control group, MCT+Saline group or MCT+Omalizumab group. Saline or Omalizumab treatments were started from 14 days post-MCT injection, and lasted for 2 weeks. Omalizumab (Novartis, China) was injected subcutaneously, 200 μg/dose/rat, every week, total 2 doses for each rat, or saline injection.

Forthe *Fcer1a* knockout mice model, 8- to 10-week-old male WT and KO mice weighing 25-30 g were randomly assigned to normoxia and hypoxia exposure for 4 weeks.

For MC-specific *Fcer1a* knockout mice model, 8- to 10-week-old male WT and MCKO mice weighing 25-30 g were randomly assigned to normoxia and hypoxia exposure for 4 weeks.

All animal experiments were conducted under protocols approved by the Animal Research Committee of the Institute of Laboratory Animals, Chinese Academy of Medical Sciences and Peking Union Medical College (ACUC-A01-2018-005).

**Single-cell RNA-seq and analyses**

Lung tissues from mice under hypoxia exposure for 0, 1, 2 and 4 weeks were harvested and scRNA-seq were performed. The lung tissue was digested for 15 min at 37°C in PBS containing 200 U/ml collagenase I (Sigma Aldrich), 0.05 U/ml elastase (Sigma Aldrich), 5 U/ml neutral protease (Worthington), and 0.3 U/ml deoxyribonuclease I (Promega). The digested tissues were neutralized with DMEM containing 10% FBS (Gibco, USA.) and filtered through a 40 μm cell strainer (Invitrogen, USA) to obtain single-cell suspensions. Live lung cells were sorted in PBS containing 0.5% BSA using a 100 μm nozzle on a Moflo-XDP cell sorter (Beckman, USA). Single-cell suspensions of the four groups (hypoxia 0, 1, 2 and 4 weeks) of were loaded on a Chromium Single-Cell Controller (10X Genomics) to generate single-cell and gel bead emulsion (GEM). The single-cell sequencing library was prepared according to the instructions of the Chromium Single-Cell 3’ Library & Gel Bead Kit v2 (10X Genomics). The libraries were sequenced on an Illumina HiSeq X Ten in paired-end reads to enable approximately 50,000 reads per single-cell (Novo Generation Bioinformatics Technology Co., Ltd.).

The 10X Genomics single-cell transcriptome sequencing data were filtered by removing bases with a mass less than 3 at the beginning and end of the reads, using the CellRanger software suite version 3.1 pipeline [1]. The filtered reads were aligned to the MM10 mouse reference genome by STAR. For further analyses and statistics, based on the barcode and gene expression matrix, single-cell data were log-normalized and filtered by the R package Seurat[2, 3], with the following parameters: unique gene count per cell >150, cell counts per gene >2, and percentage of mitochondrial genes <15%. We next ran a canonical correlation analysis (CCA) to identify the common sources of variation between the four groups. The four groups of data were combined for the next analyses. The t-SNE and automated cluster detection algorithms were performed stepwise based on the results of the CCA, during which the significant CCA dimensions were considered. The resolution for cluster identification was set as 1. DE genes were identified by the Wilcox test with *p*<0.05. DE genes from each cluster were sorted by log2-fold change relative to the other clusters. Then, the DE genes of which log2-fold change was more than 0 were selected and GO analyses were performed by ClusterProfiler[4]. The enriched function or pathway was further clustered to predict the most likely function of the specific cluster. Alternatively, to detect the possible cell-cell interactions among different clusters, the Python package CellPhoneDB [5] was used for the cell-cell communication analyses.

**Echocardiographic assessment**

At the endpoint of experiments performed on the experimental models, mice or rats were anesthetized with isoflurane (1.5%) and subjected to echocardiography. The body temperature was maintained at 37°C using a thermally controlled pad on a surgical table. For mice, the heart rate was kept at 500-550 beats per minute, and the echocardiography was performed with a 30 MHz probe. For rats, heart rate was kept in 400-500 beats per minute and a 10 MHz ultrasonic probe was used (Vevo 770 system; Visual Sonics). The PA acceleration and PA ejection times were obtained in both mice and rats from the parasternal short axis view at the aortic valve level using pulsed Doppler mode. The results were calculated using Visual Sonics Vevo 2100 analysis software (v. 1.6) with a cardiac measurements package and were based on the average of five cardiac cycles.

**Hemodynamic and ventricular weight measurements**

For mice, the RVSP was obtained through closed-chest insertion, as previously described[6]. After anesthesia, a 22-gauge needle connected to a pressure transducer interfaced with a PowerLab system (AD Instruments) was inserted into the RVs of anesthetized animals through a xiphocostal angle approach, and the waveform was used to confirm the position of the needle.

For rats, the hemodynamic parameters were measured by a PE catheter. The catheter was inserted through the right jugular vein into the pulmonary artery (for mPAP), the waveform was recorded by PowerLab system.

The weights of the RV and LV plus septum were measured to evaluate the extent of RV hypertrophy in mice and rats.

**Flow cytometry**

For flow cytometry analyses, single-cell suspensions of mouse lung tissue were prepared by repeated rounds of enzymatic digestion and trituration with collagenase type I, neutral protease and deoxyribonuclease I, according to a previously published protocol [7, 8]. Primary antibodies of PE-CD3 (100206, Biolegend), FITC-CD4 (11-0041-85, eBioscience), PE-CD21 (552957, BD), FITC-CD23 (101604, Biolegend), FITC-CD19 (11-0193-82, eBioscience), PE-IL4 (12-7041-82, eBioscience), PE-CD45(103106, Biolegend), FITC-FcɛRIα (11-5898-82, Invitrogen), APC-CD117 (105812, Biolegend), and PE-IgE (406907, Biolegend) were used at 1:100 dilution ratio. The results were analyzed with FlowJo 7.6 software (FlowJo, LLC.).

**Enzyme-linked immunosorbent assay (ELISA) detection of serum IgE**

Mouse serum IgE concentrations were measured using an ELISA kit (88-50460-88, eBioscience) according to the manufacturer’s instructions. Rat serum IgE concentrations were measured using an ELISA kit (RK00201, ABclonal) according to the manufacturer’s instructions. Serum IgE in human subjects was measured using a Procarta Plex Multiplex immunoassay (MultiSciences Biotech) according to the manufacturer’s instructions.

**Histological analyses**

Animals were anesthetized with urethane and sacrificed after hemodynamic measurement. The vasculature was perfused with chilled PBS. The left lung tissue was instilled through airway by 10% formaldehyde at controlled pressure (about 25cm H2O above the highest point of the lung). After being fixed at 4°C for 24 hours, the lung tissues were embedded in paraffin. The fixed lung tissues were randomly cut into serial parallel slices. The tissues slices were embedded in paraffin in the same orientation. Lung tissues from PAH patients and non-PAH donors was immediately fixed in 10% formaldehyde at 4°C for 24 hours and embedded in paraffin. To perform morphometric analyses, embedded lung tissues were sectioned in 5-μm thickness.

For H&E staining, the slices were dewaxed and stained with hematoxylin and eosin, according to the manufacturer’s instructions (Zhong Shan Jin Qiao).

For immunohistochemistry and immunofluorescence staining, after dewaxing and antigen retrieval (by citric acid buffer pH=6.0), the slices were incubated with the appropriate primary antibody at 4°C overnight followed by an Alexa Fluor 488- or 594- (Thermo, 1:1 000, 45 min) or horseradish peroxidase (HRP)-conjugated secondary antibody (Zhong Shan Jin Qiao). Primary antibodies against α-SMA (ab5694, 1:400), c-Kit (ab115801, 1:200), and FcɛRIα (ab54411, 1:100) were obtained from Abcam. Primary antibody against IL6 (66146-1-1g, 1:100) was obtained from Proteintech and antibody against IL13 (A2089) was obtained from Abclonal.

For the assessment of the wall thickness in experimental PH models, 15 fields from 3 lung sections per mouse or rat were randomly selected and captured. All images taken from the lung sections were coded so that the experimenters were blinded during assessment. Small vessels (< 100 μm in diameter) were selected from those accompanied respiratory bronchioles or more distal airways. Approximately 20-40 small vessels were selected and categorized into two groups (20-50 μm and 50-100 μm in diameter). The wall thickness of each group was calculated respectively with the formula, [(2 × medial wall thickness/ external diameter) × 100], as a previous study described [9].

For the assessment of small pulmonary vessel muscularization (under 100 μm in diameter), the extent of circumferential α-SMA-positive staining was categorized as nonmuscularization (N), partial muscularization (P) and full muscularization (F), as previously described. Briefly, full muscularization (F) was defined as a distinct α-SMA-positive staining throughout the vessel cross section (positive in double elastic lamina). Partial muscularization (P) was considered when at least half of the circumference of vessels showed α-SMA-positive [10]. Less than half of the vascular circumference showed positive staining was considered as nonmuscularization (N). 30-50 randomly selected vessels (accompanied respiratory bronchioles or more distal airways) from 15 fields taken from 3 lung sections per mouse or rat (as described above) were assessed by experimenters who were blinded to the experiments. Frequency for each type of muscularization from each animal was presented as a ratio to total number of vessels counted.

For the quantification of area with positive immunostaining, a total of 9 images taken from 3 lung sections per mouse were blindly selected and analyzed using Image-Pro Plus software (Media Cybernetics, Bethesda, MD). The positive area content was shown as a ratio of positive area to total area. The positive cell number was shown as a ratio of positive cell number to field area (mm2).

All the assessment and analyses were completed by experimenters blinded to the experiments.

**Cell culture and lentiviral infection**

To prepare BMMCs, bone marrow cells from C57BL/6 male mice were cultured in RPMI 1640 medium (Solarbio) for 5-6 weeks with 10 ng/ml mouse recombinant IL-3 (PeproTech) and 10 ng/ml stem cell factor (PeproTech), as reported previously[11]. Human PASMCs were obtained from Sciencell and cultured in smooth muscle cell medium (Sciencell). Human LAD2 mast cell was purchased from ATCC and cultured in RPMI 1640 medium (for LAD2) containing 10% fetal bovine serum (FBS). The cells were cultured at 37°C with 5% CO2 in humidified conditions. For IgE treatment, LAD2 was stimulated with recombinant IgE (D6406, Sigma Aldrich) at a concentration of 10 μg/ml. To knock down *IL6* and *IL13*, sh*IL6* lentivirus and sh*IL13* lentivirus were packaged and transduced into LAD2 cells. The knockdown efficiency was determined by RT-qPCR and western blot. The target sequences were 5'- GCAGGACATGACAACTCATCT-3' for *IL6*, and 5'- GCTGGTCAACATCACCCAGAA-3' for *IL13*.

**Cell growth assay**

The growth of PAECs was determined using a Cell Counting Kit-8 (CCK8; Dojindo) according to the manufacturer’s protocol. Briefly, 1×103 cells were seeded in 96-well plates for the different treatments. After 24 hours, fresh culture medium containing 10 μl CCK8 solution was added, and the plate was incubated for 1 hour at 37°C. The absorbance was measured at 450 nm.

**RNA sequencing**

BMMCs stimulated with or without IgE were collected for RNA-seq analyses. To prepare the rRNA depleted RNA-seq library, anNEB Next, Ultra TM RNA Library Prep kit (NEB, Beijing, China) was used for Illumina HiSeq 3000 sequencing according to the manufacturer’s instructions. Subsequently, the library was sequenced by Novogene (Beijing Novogene Bioinformatics Technology Co., Ltd., Beijing, China).

**RNA-seq analyses**

All paired-end reads were processed using the Trim Galore software (version 0.3.7) with “-q 25 -stringency 5 -length 50 -paired -phred33,” parameters to remove the adaptors and low-quality sequences. Then, the filtered reads were mapped to the reference genome using HISAT2 software with default parameters[12, 13]. The reference genome sequences and the gene annotation files (GTF format) of both rat and mouse were downloaded from the website of the Ensembl Project (ftp://ftp.ensembl.org/pub/release-92). To obtain the expression levels of the annotated genes, Genomic Features and Genomic Alignments packages [14] were used to calculate the read counts of each gene, and then the DESeq2 package [15] was used to normalize the read counts among samples and to calculate the fragments per kilobase of exon per million reads mapped (FPKM) of the genes. The DESeq2 package was used to determine the DE genes that showed significant changes between samples with or without IgE treatment with a *p*-value of 0.05. Furthermore, genes with upregulated or downregulated expression were chosen for further analyses, and those with an FPKM <1 were eliminated. The DE genes were presented as heatmap figures drawn by the “pHeatmap” R package.

**Total RNA isolation and reverse transcription quantitative real-time polymerase chain reaction (RT-qPCR)**

Total RNA was extracted from the frozen lung tissues or cultured cells by TRIzol reagent (Invitrogen) according to the manufacturer’s instructions. The concentration and purity of the RNA samples were evaluated with a Nanodrop. Reverse-transcription of the first chain was performed using a FastKing RT kit (Tiangen Biotech) according to the manufacturer’s instructions. The mRNA expression levels of genes were examined by RT-qPCR. The expression of each gene in this study was normalized to that of the reference gene. The primer sequences are shown in Supplementary Table 2.

**Western blot analyses**

Protein samples were extracted from frozen lung tissues or cultured cells. Protein samples (20mg) were fractionated by sodium dodecyl sulfate-polyacrylamide gel electrophoresis (SDS-PAGE) using 8-12% polyacrylamide gels. Separated protein was transferred to a 0.45μm PVDF membrane. After blocking in 5% milk/Tris-buffered saline-Tween (TBST) for 1 hour at room temperature, the membrane was incubated with the appropriate primary antibody: FcεRIα (10980-1-AP, Proteintech), β-ACTIN (AC026, Abclonal), PCNA (BM3888, Boster) at 4°C overnight. After washing three times with TBST, the membrane was incubated with corresponding HRP-labeled rabbit or mouse secondary antibodies (Invitrogen, 1:5 000 or 1:4 000). Immunoreactive bands were visualized with Super Signal West Pico Chemiluminescent Substrate (Pierce).

**Supplementary Table**

**Supplementary Table 1. Demographic and clinical characteristics of PAH patients and healthy people.**

| **Feature** | **Patients**  **with iPAH**  **(N=124)** | **Control Subject**  **(N=116)** | ***p* value** |
| --- | --- | --- | --- |
| **Age at sampling, y** | 32.0 ± 8.1 | 33.1 ± 5.0 | 0.18 |
| **Female: Male(ratio)** | 3.1:1 | 2.9:1 | 0.79 |
| **NYHA functional class** |  | N/A |  |
| **I** | 5/124 |  | - |
| **II** | 51/124 |  | - |
| **III** | 62/124 |  | - |
| **IV** | 6/124 |  | - |
| **Hemodynamics** |  | N/A |  |
| **Mean right atrial pressure, mmHg** | 5.2±4.2 |  | - |
| **Pulmonary capillary wedge pressure, mmHg** | 7.0±3.5 |  | - |
| **Mean pulmonary artery pressure, mmHg** | 56.1±15.2 |  | - |
| **Cardiac index** | 2.8±0.8 |  | - |
| **Cardiac output, L/min** | 4.6±1.6 |  | - |
| **Total Pulmonary Resistance, dyn·s·cm-5** | 1138.2±537.1 |  | - |
| **6-min walk distance, m** | 424.5±95.5 | N/A | - |
| **SvO2%** | 67.8±7.7 | N/A | - |
| **NT-proBNP, pg/mL** | 1272.5±1250.7 | N/A | - |
| **Creatinine, μmol/L** | 74.7±15.8 | N/A | - |
| **Uric Acid, μmol/L** | 731.3±135.1 | N/A | - |
| **C Reactive Protein, mg/L** | 3.08±3.0 | N/A | - |
| **PAH therapy** |  | N/A |  |
| **Prostacyclin analogue** | 6/124 |  | - |
| **Endothelin antagonist** | 28/124 |  | - |
| **Phosphodiesterase5 inhibitor** | 87/124 |  | - |
| **Blood cells (%)** |  |  |  |
| **Neutrophils** | 58.75±0.89 | 57.99±0.82 | 0.52 |
| **Lymphocytes** | 33.63±0.88 | 32.90±0.74 | 0.51 |
| **Monocytes** | 5.90±0.20 | 6.21±0.13 | 0.18 |
| **Eosinophils** | 1.47±0.11 | 2.23±0.16 | <0.0001 |
| **Basophils** | 0.25±0.02 | 0.68±0.03 | <0.0001 |

Values are presented by mean ± SD. NYHA, New York Heart Association; SvO2, Oxygen saturation of mixed venous blood; NT-proBNP, N-terminal pro brain natriuretic peptide. Differences between groups were assessed by unpaired two-tailed t-test.

**Supplementary Table 2. Sequences of qPCR primers.**

| Name |  | Sequence |
| --- | --- | --- |
| *Cd28* | Forward | 5' ATAGCAACGAGGTCAGCCTC 3' |
|  | Reverse | 5' GTCGCAGTTGAACTCGGCAT 3' |
| *Gata3* | Forward | 5' CCTCTGGAGGAGGAACGCTAAT 3' |
|  | Reverse | 5' GTTTCGGGTCTGGATGCCTTCT 3' |
| *Cd40* | Forward | 5' ACCAGCAAGGATTGCGAGGCAT 3' |
|  | Reverse | 5' GGATGACAGACGGTATCAGTGG 3' |
| *Cd86* | Forward | 5' CTTGCTGATCTCAGATGCTG 3' |
|  | Reverse | 5' GTGCTCGTACAGAACCAACT 3' |
| *Il4* | Forward | 5' TTGTCATCCTGCTCTTCTTTCTC 3' |
|  | Reverse | 5' CAGGAAGTCTTTCAGTGATGTGG 3' |
| *Glε* | Forward | 5' GCACAGGGGGCAGAAGAT 3' |
|  | Reverse | 5' CCAGGGTCATGGAAGCAGTG 3' |
| *Fcer1a* (mouse) | Forward | 5' TGAGTGCCACCGTTCAAGACAG 3' |
|  | Reverse | 5' TGGCATCTGATGTCAAAGGATCC 3 |
| *Fcer1a* (rat) | Forward | 5' CTGGTGCAGTTAGCACCTGA 3' |
|  | Reverse | 5' TGGCACTCACAATGACCCAA 3' |
| *FCER1A*(human) | Forward | 5' GTGGAGAATACAAATGTCAGCACC 3' |
|  | Reverse | 5' CTCCATCACCACCTCAGCAGAG 3' |
| *Il6* (mouse) | Forward | 5' TACCACTTCACAAGTCGGAGGC 3' |
|  | Reverse | 5' CTGCAAGTGCATCATCGTTGTTC 3' |
| *Il6* (rat) | Forward | 5' CCTTCTTGGGACTGATGT 3' |
|  | Reverse | 5' ACTGGTCTGTTGTGGGTG 3' |
| *IL6* (human) | Forward | 5' AGACAGCCACTCACCTCTTCAG 3' |
|  | Reverse | 5' TTCTGCCAGTGCCTCTTTGCTG 3' |
| *Il13* (mouse) | Forward | 5' AACGGCAGCATGGTATGGAGTG 3' |
|  | Reverse | 5' TGGGTCCTGTAGATGGCATTGC 3' |
| *Il13* (rat) | Forward | 5' GTATGGAGCGTGGACCTGAC 3' |
|  | Reverse | 5' TCAGTGGCCATAGCGGAAAA 3' |
| *IL13* (human) | Forward | 5' ACGGTCATTGCTCTCACTTGCC 3' |
|  | Reverse | 5' CTGTCAGGTTGATGCTCCATACC 3' |

**Supplementary Figures and Legends**

**Supplementary Figure 1. Characterization of the hypoxia-induced PH mouse model and sample collection for scRNA-seq. A.** Schematic diagram for the hypoxia-induced PH mouse model in C57BL/6 mice and sample collection for scRNA-seq. **B.** RVSP of C57BL/6 mice before (H0w) and after 4 weeks of hypoxia (H4w). **C.** RV/LV+S of these mice. **D.** PA AT/ET of these mice. **E.** Representative image of H&E and α-SMA staining, scale bar=25μm. **F.** Quantification of wall thickness. **G.** Proportion of non-muscularized (N), partially muscularized (P), or full muscularized (F) pulmonary arterioles. All above quantitative results are shown as mean ± SEM, and difference between groups was evaluated by unpaired two-tailed t-test. ***p*<0.01, and ****p*<0.001.

**Supplementary Figure 2. Bar plots of enriched GO pathways between pairs of time points.**

**Supplementary Figure 3. ScRNA-seq revealed Th2 response and T cell-B cell interaction in hypoxia-induced mice PH model.**

**A.** Cell cluster identification by *Cd45*, *Cd3d* and *Cd4* enrichment on t-SNE plot. **B.** GO pathway enrichment bar plot of DEGs in *Cd4*+ T cells during hypoxia exposure. **C.** Flow cytometry quantification of CD3+ CD4+ T cells. (n=5 mice in 0-week hypoxia and n=8 mice in 4-week hypoxia). **D.** Flow cytometry quantification of CD4+ IL4+ T cells. (n=5 mice in 0-week hypoxia and n=8 mice in 4-week hypoxia). **E.** Relative mRNA expression of *Il4* and *Gata3* in CD4+ T cells (n=4). **F.** Dot plot of the interaction of gene pairs between B cells and *Cd4*+ T cells (*Cd40lg*_*CD40*, *Cd28*_*Cd86* )in four hypoxia groups. **G.** Dot plots of the expression of *Cd86*, *Cd40* in B cell (left), and *Cd28*, *Cd40lg* in *Cd4*+ T cell (right) in four hypoxia groups. **H.** Relative mRNA expression of *Cd28* in CD4+ T cells and relative mRNA expression of *Cd40* and *Cd86* in CD19+ B cells (n=4). For **C-E** and **H**, quantitative results are shown as mean ± SEM and compared by unpaired two-tailed t-test. **p*<0.05, ***p*<0.01, ****p*<0.001.

**Supplementary Figure 4. The efficiency of anti-IgE neutralizing antibody in mice and rats. A.** Serum IgE levels in isotype control antibody- and anti-IgE antibody-treated mice under normoxia or hypoxia. **B.** Serum IgE levels in isotype control antibody- and anti-IgE antibody-treated rats after saline or MCT injection. All above quantitative results are shown as mean ± SEM. Difference between multiple groups was evaluated by two-way ANOVA with Bonferroni’s post hoc test. **p*< 0.05 in control mice or rats, ****p*<0.001 in PH mice or rats, ##*p*<0.01 control vs PH in mice or rats.

**Supplementary Figure 5. Expression of *Il6* and *Il13* in MCT-induced rat PH models. A.** Relative mRNA expression of *Il6* and *Il13* in lung tissues of MCT-exposed rats. **B.** Relative mRNA expression of *Il6* and *Il13* in lung tissues of MCT-exposed rat treated with isotype control or anti-IgE. All values are presented as the mean ± SEM and compared by unpaired two-tailed t-test. n=6 for each group. **p*< 0.05 and ****p*< 0.001, n=6 for each group.

**Supplementary Figure 6. Graphical abstract.** In the pulmonary vasculature, stimulated B cells undergo class-switching to produce IgE. The increased levels of IgE bind to the FcεRIα receptor and activate mast cells to release IL6 and IL13, which in turn induce the proliferation of smooth muscle cells and vascular remodeling in PH. Blocking IgE with antibodies such as Omalizumab effectively targets this key mediator and ameliorates experimental PH.

**References**

1. Zheng, G.X., et al., *Massively parallel digital transcriptional profiling of single cells.* Nat Commun, 2017. **8**: p. 14049.

2. Butler, A., et al., *Integrating single-cell transcriptomic data across different conditions, technologies, and species.* Nat Biotechnol, 2018. **36**(5): p. 411-420.

3. Satija, R., et al., *Spatial reconstruction of single-cell gene expression data.* Nat Biotechnol, 2015. **33**(5): p. 495-502.

4. Yu, G., et al., *clusterProfiler: an R package for comparing biological themes among gene clusters.* Omics-a Journal of Integrative Biology, 2012. **16**(5): p. 284-287.

5. Vento-Tormo, R., et al., *Single-cell reconstruction of the early maternal-fetal interface in humans.* Nature, 2018. **563**(7731): p. 347-353.

6. Wang, L., et al., *Targeting IL-17 attenuates hypoxia-induced pulmonary hypertension through downregulation of beta-catenin.* Thorax, 2019. **74**(6): p. 564-578.

7. Kim, K., et al., *Transcriptome Analysis Reveals Nonfoamy Rather Than Foamy Plaque Macrophages Are Proinflammatory in Atherosclerotic Murine Models.* Circ Res, 2018. **123**(10): p. 1127-1142.

8. Gallagher, M.P., et al., *Detection of true IgE-expressing mouse B lineage cells.* J Vis Exp, 2014(94).

9. Tu, L., et al., *Selective BMP-9 Inhibition Partially Protects Against Experimental Pulmonary Hypertension.* Circ Res, 2019. **124**(6): p. 846-855.

10. Kikuchi, N., et al., *Selenoprotein P Promotes the Development of Pulmonary Arterial Hypertension: Possible Novel Therapeutic Target.* Circulation, 2018. **138**(6): p. 600-623.

11. Wang, J., et al., *IgE actions on CD4+ T cells, mast cells, and macrophages participate in the pathogenesis of experimental abdominal aortic aneurysms.* EMBO Mol Med, 2014. **6**(7): p. 952-69.

12. Kuklina capital Ie, C.E.M.C., I.V. Nekrasova, and Y.V. Valieva, *Involvement of Semaphorin (Sema4D) in T-Dependent Activation of B Cells.* Bull Exp Biol Med, 2017. **163**(4): p. 447-450.

13. Zhu, J., et al., *GATA-3 promotes Th2 responses through three different mechanisms: induction of Th2 cytokine production, selective growth of Th2 cells and inhibition of Th1 cell-specific factors.* Cell Res, 2006. **16**(1): p. 3-10.

14. Lawrence, M., et al., *Software for computing and annotating genomic ranges.* PLoS Comput Biol, 2013. **9**(8): p. e1003118.

15. Love, M.I., W. Huber, and S. Anders, *Moderated estimation of fold change and dispersion for RNA-seq data with DESeq2.* Genome Biol, 2014. **15**(12): p. 550.


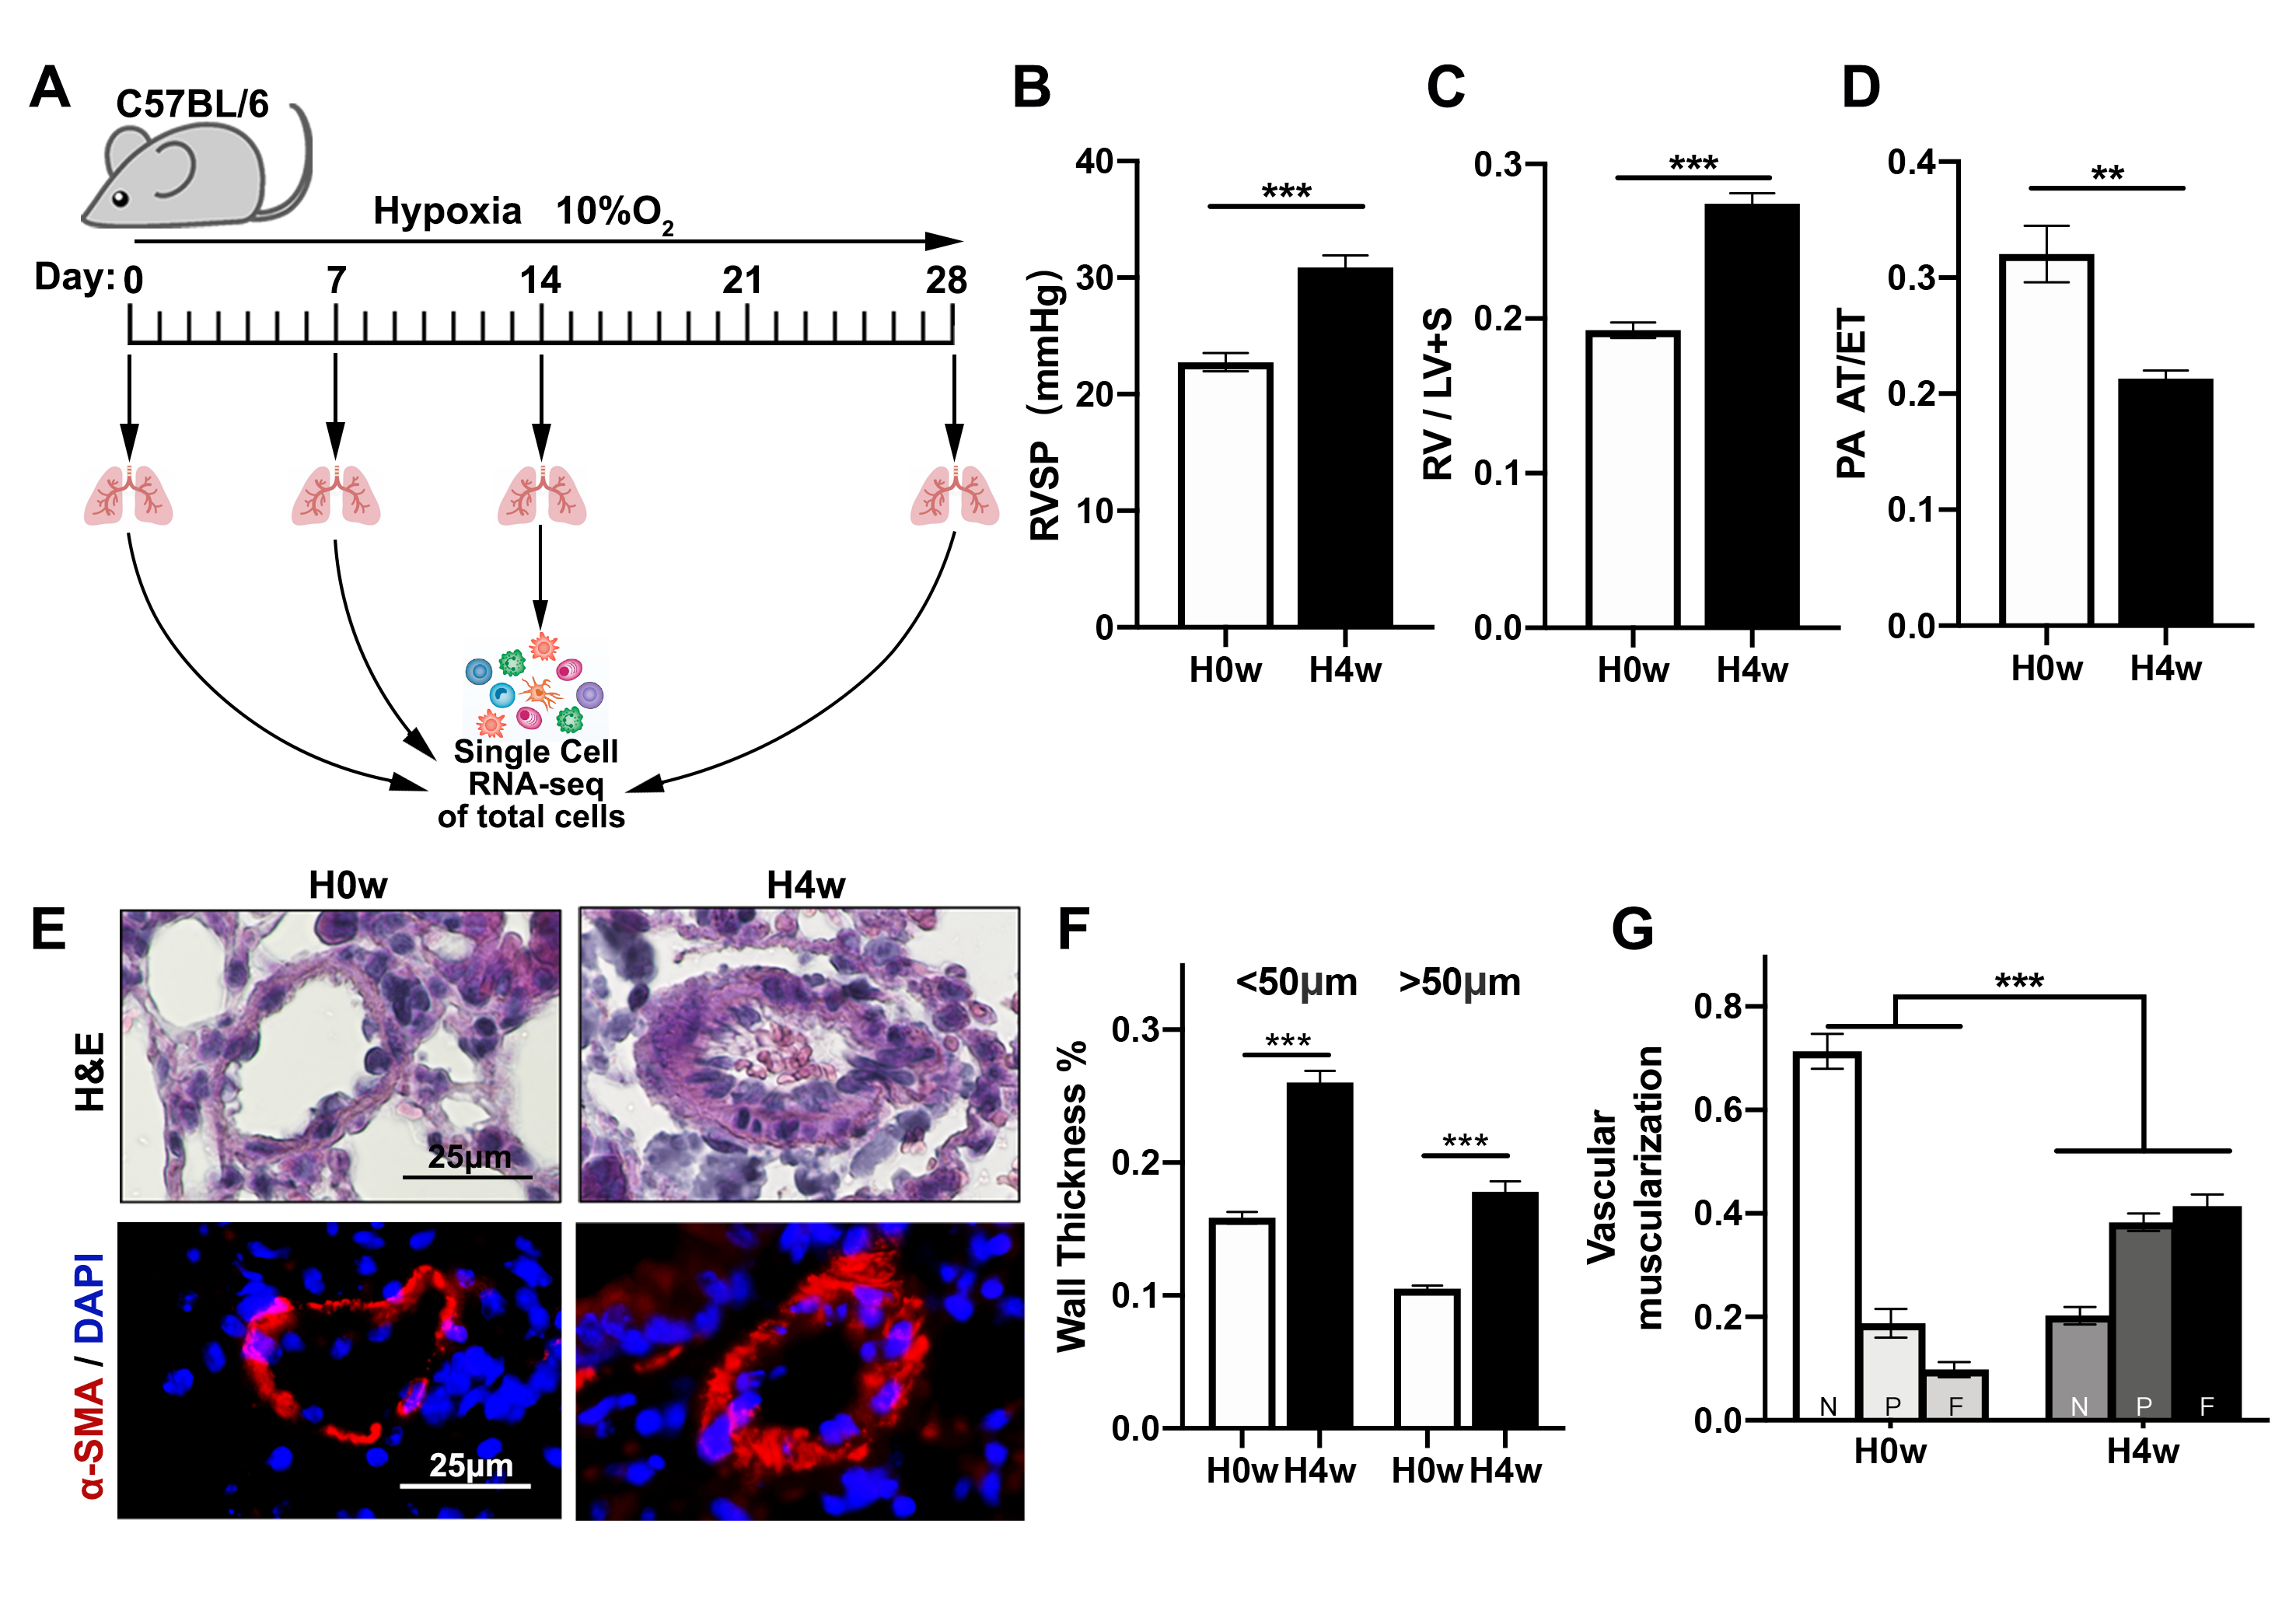


**Supplementary Figure 1. Characterization of the hypoxia-induced PH mouse model and sample collection for scRNA-seq.**


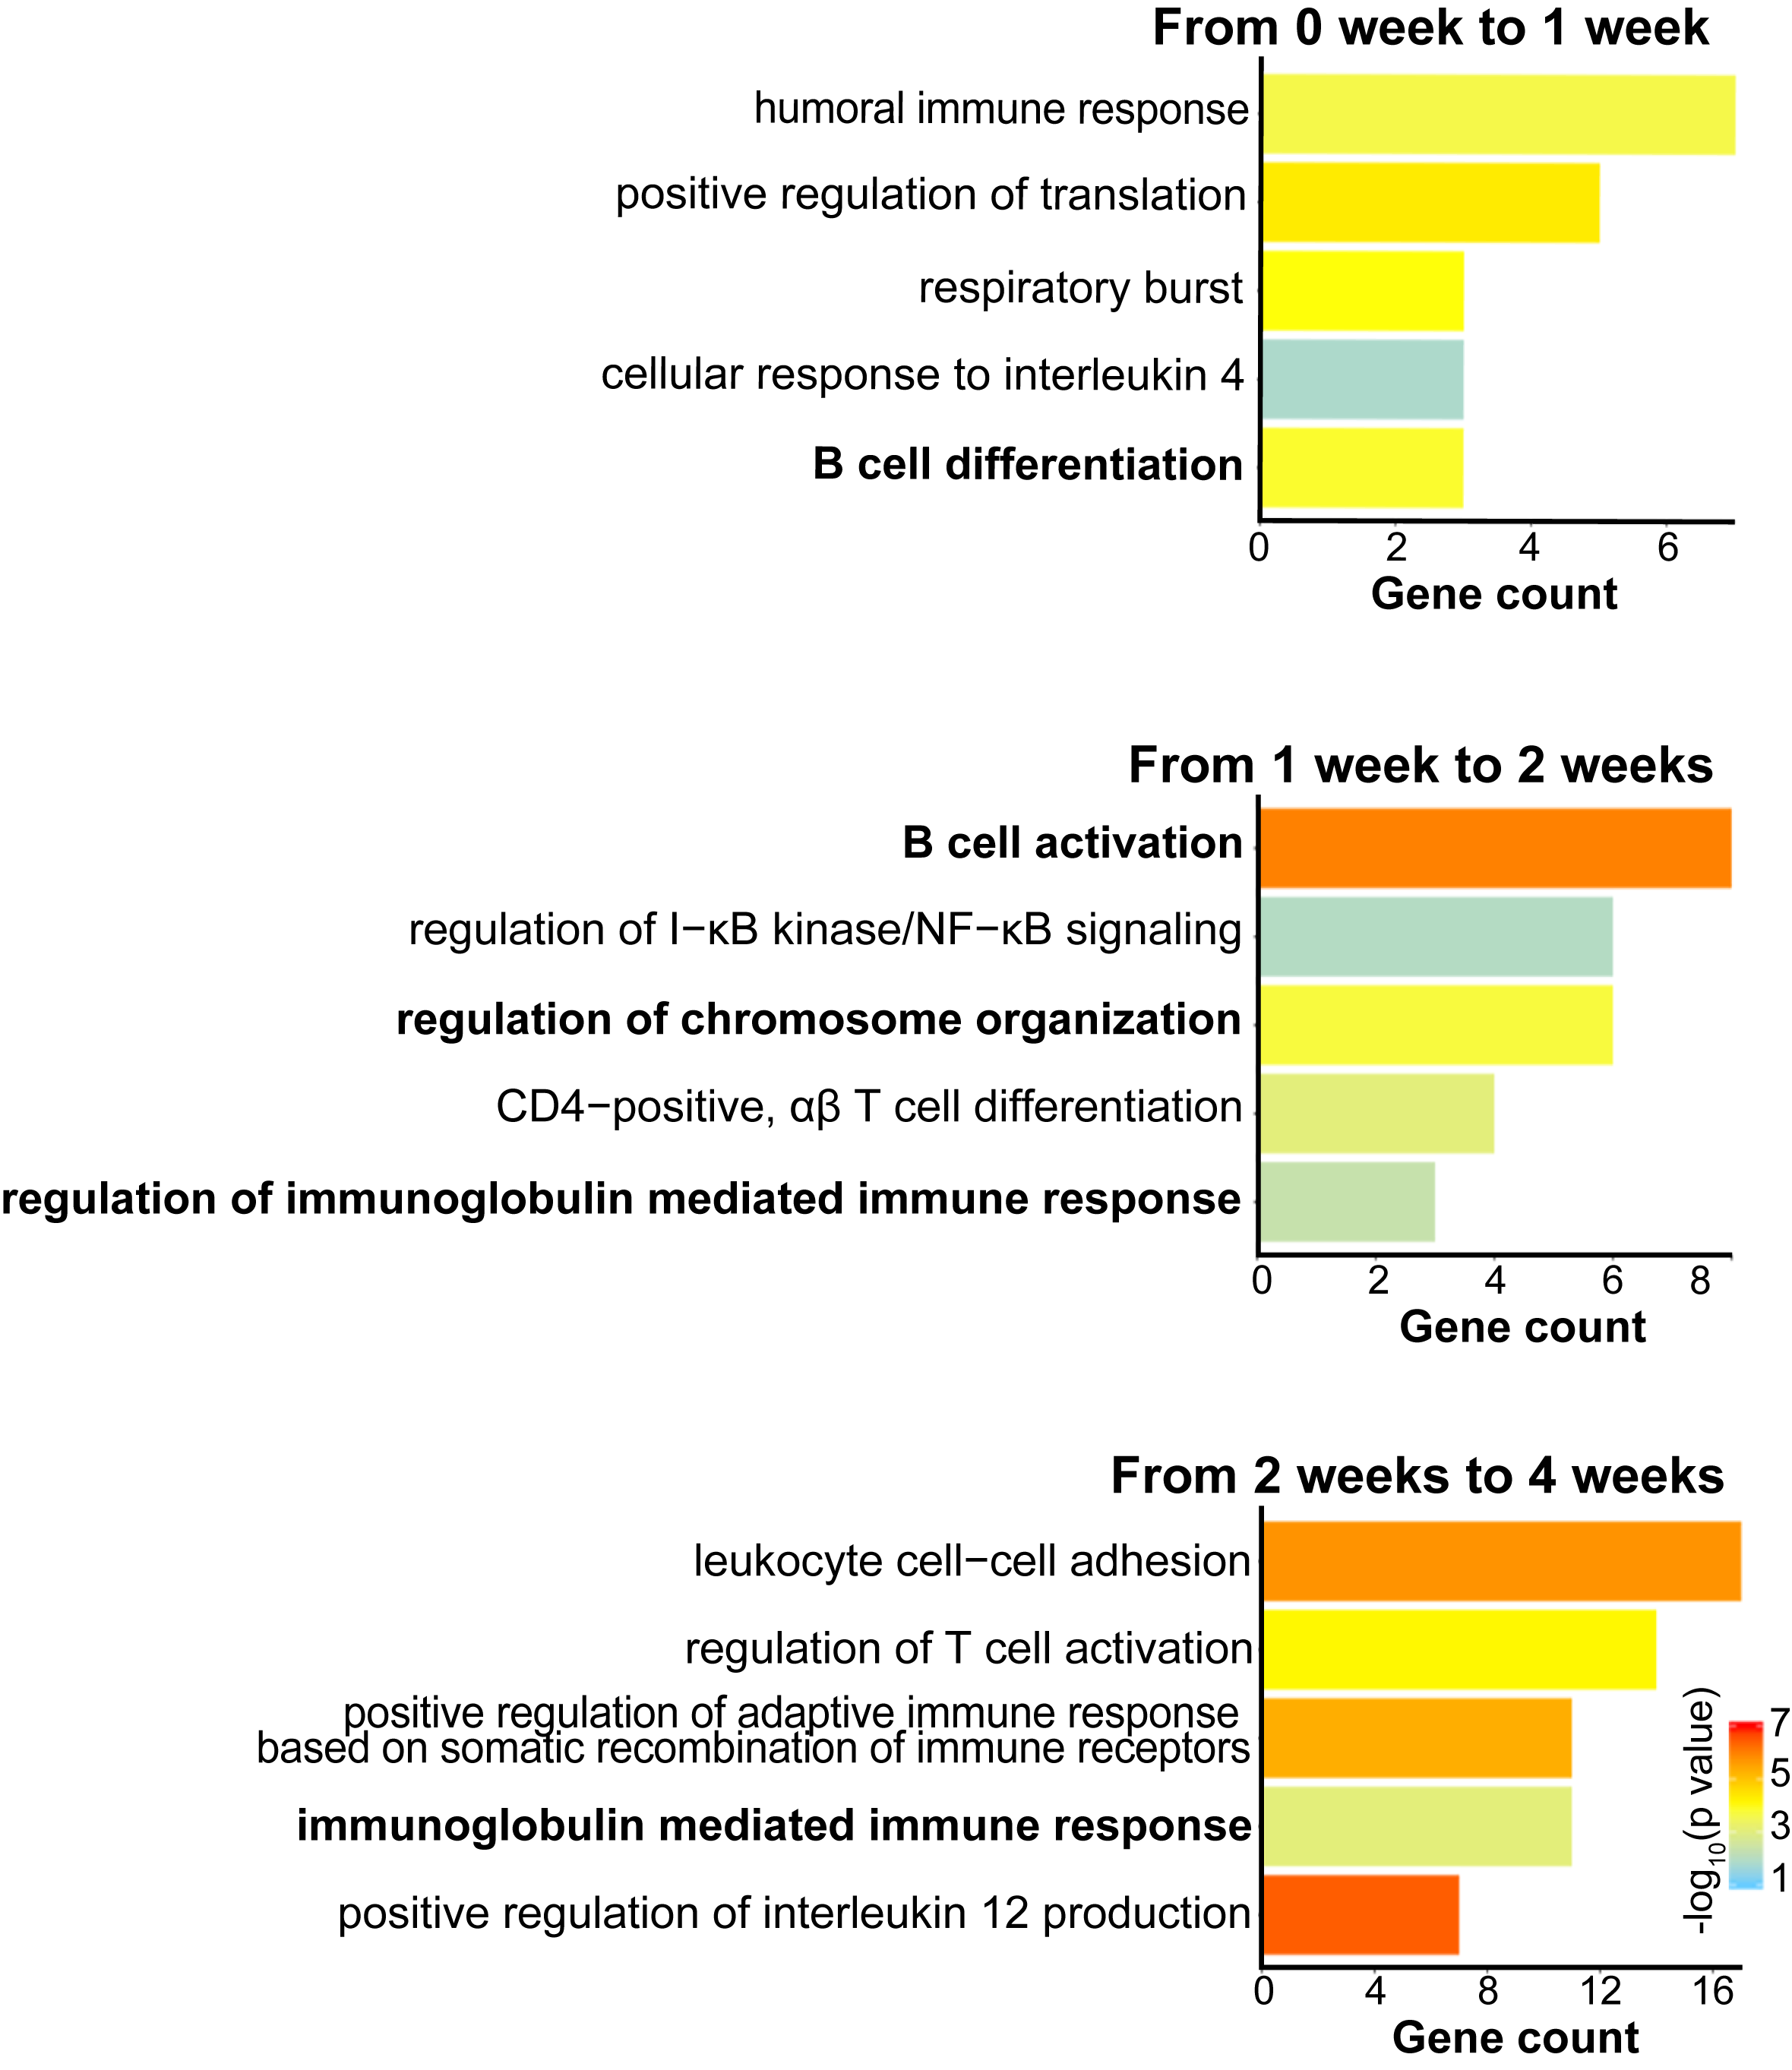


**Supplementary Figure 2. Bar plots of enriched GO pathways between pairs of time points.**


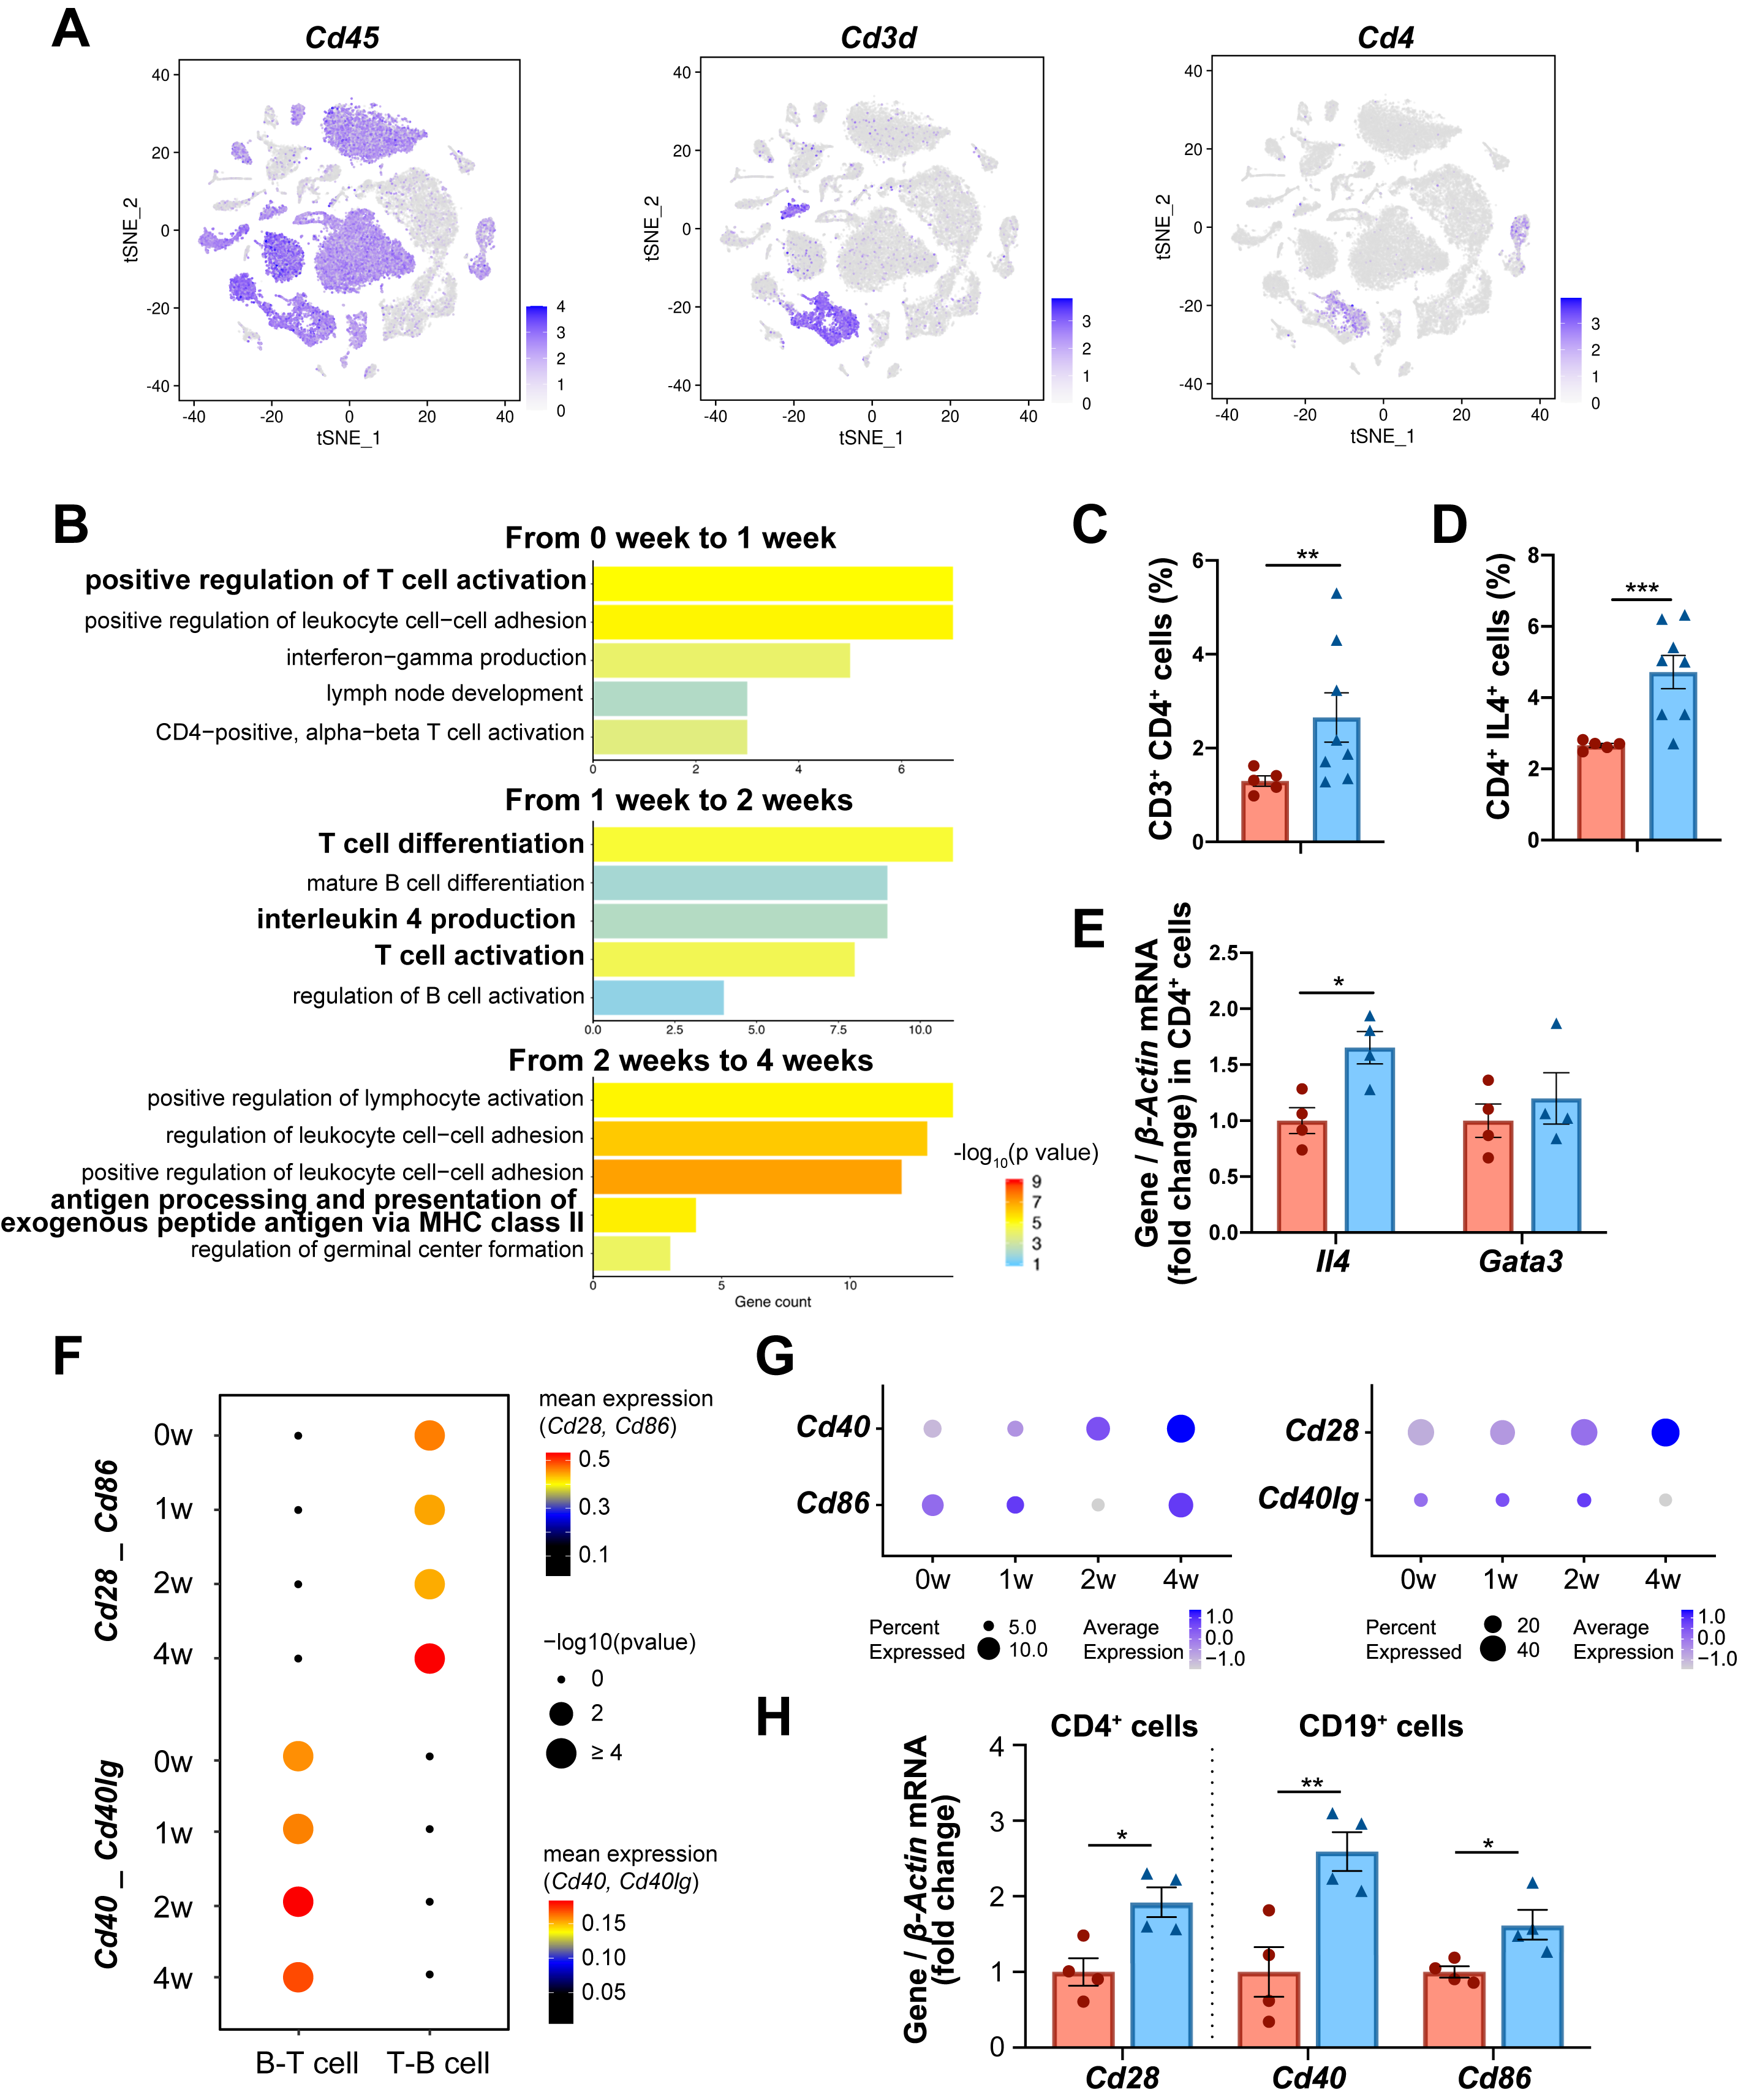


**Supplementary Figure 3. ScRNA-seq revealed Th2 response and T cell-B cell interaction in hypoxia-induced mice PH model.**


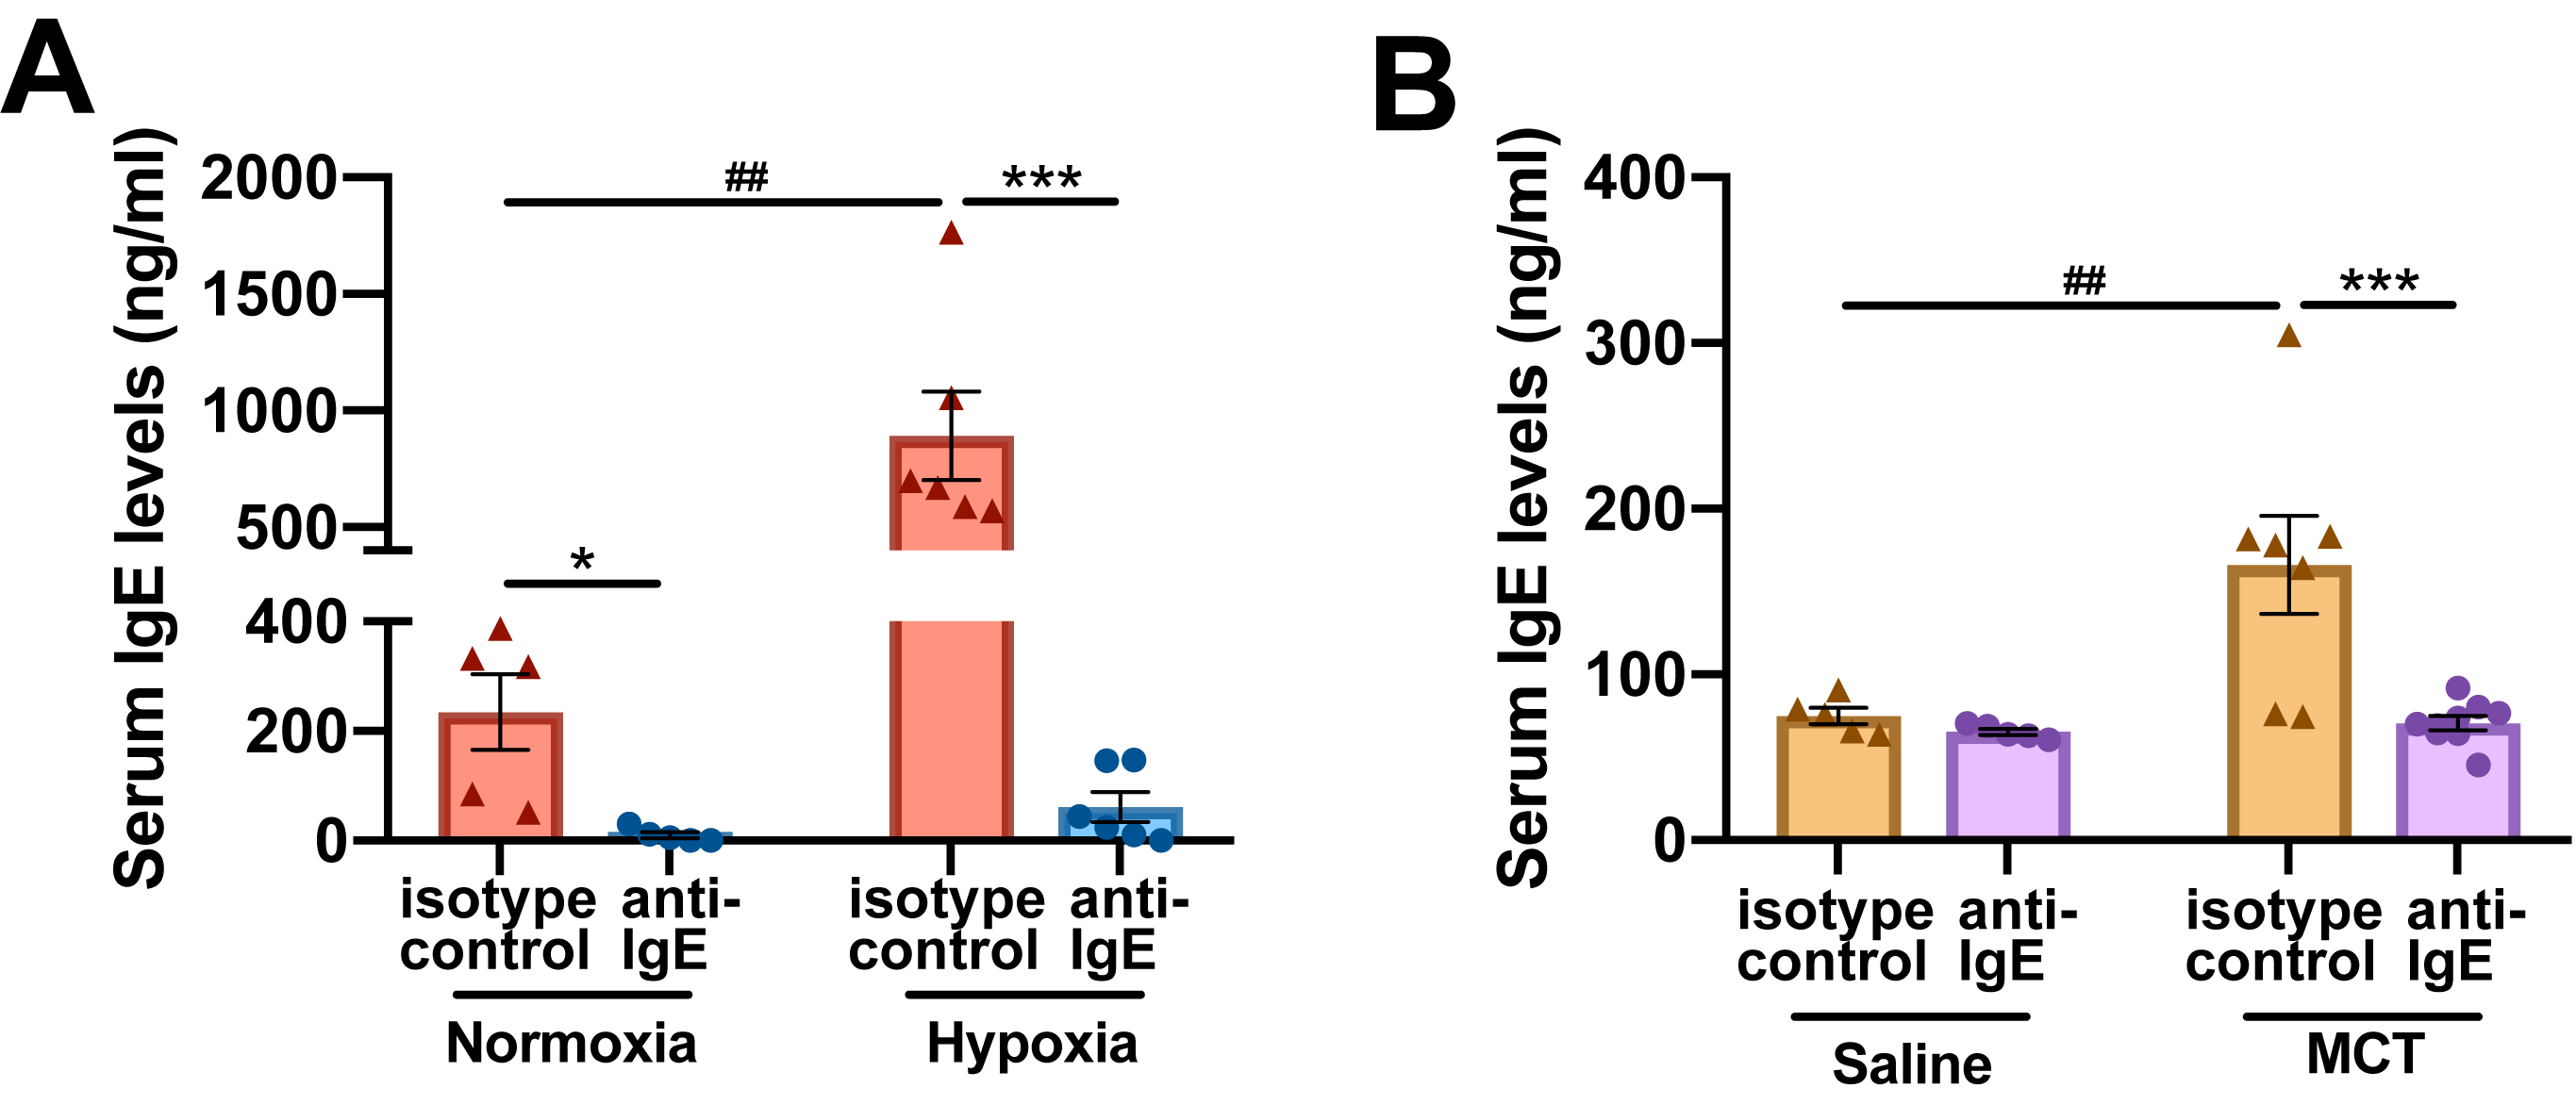


**Supplementary Figure 4. The efficiency of anti-IgE neutralizing antibody in mice and rats.**


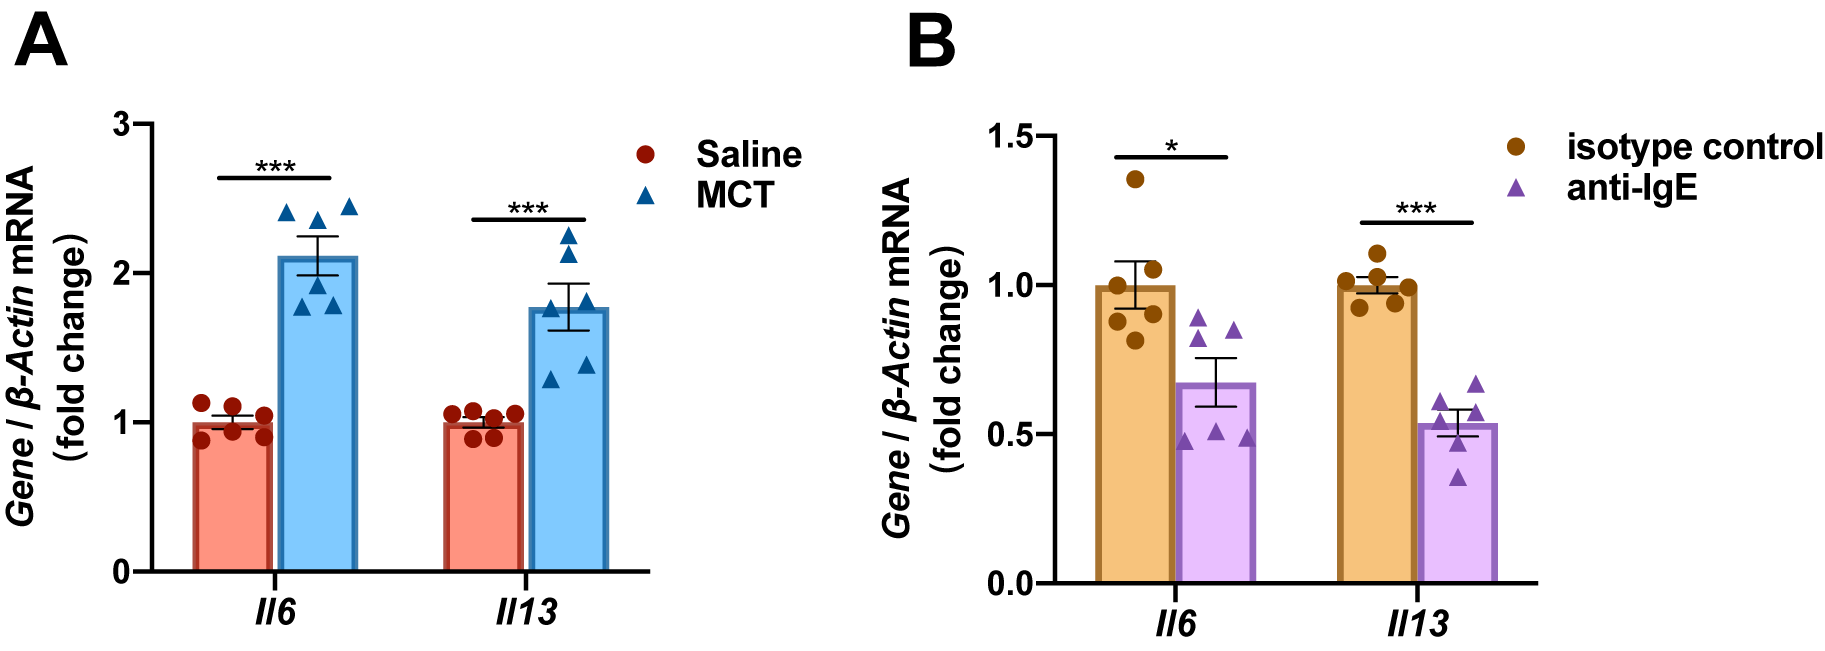


**Supplementary Figure 5. Expression of *Il6* and *Il13* in MCT-induced rat PH models.**


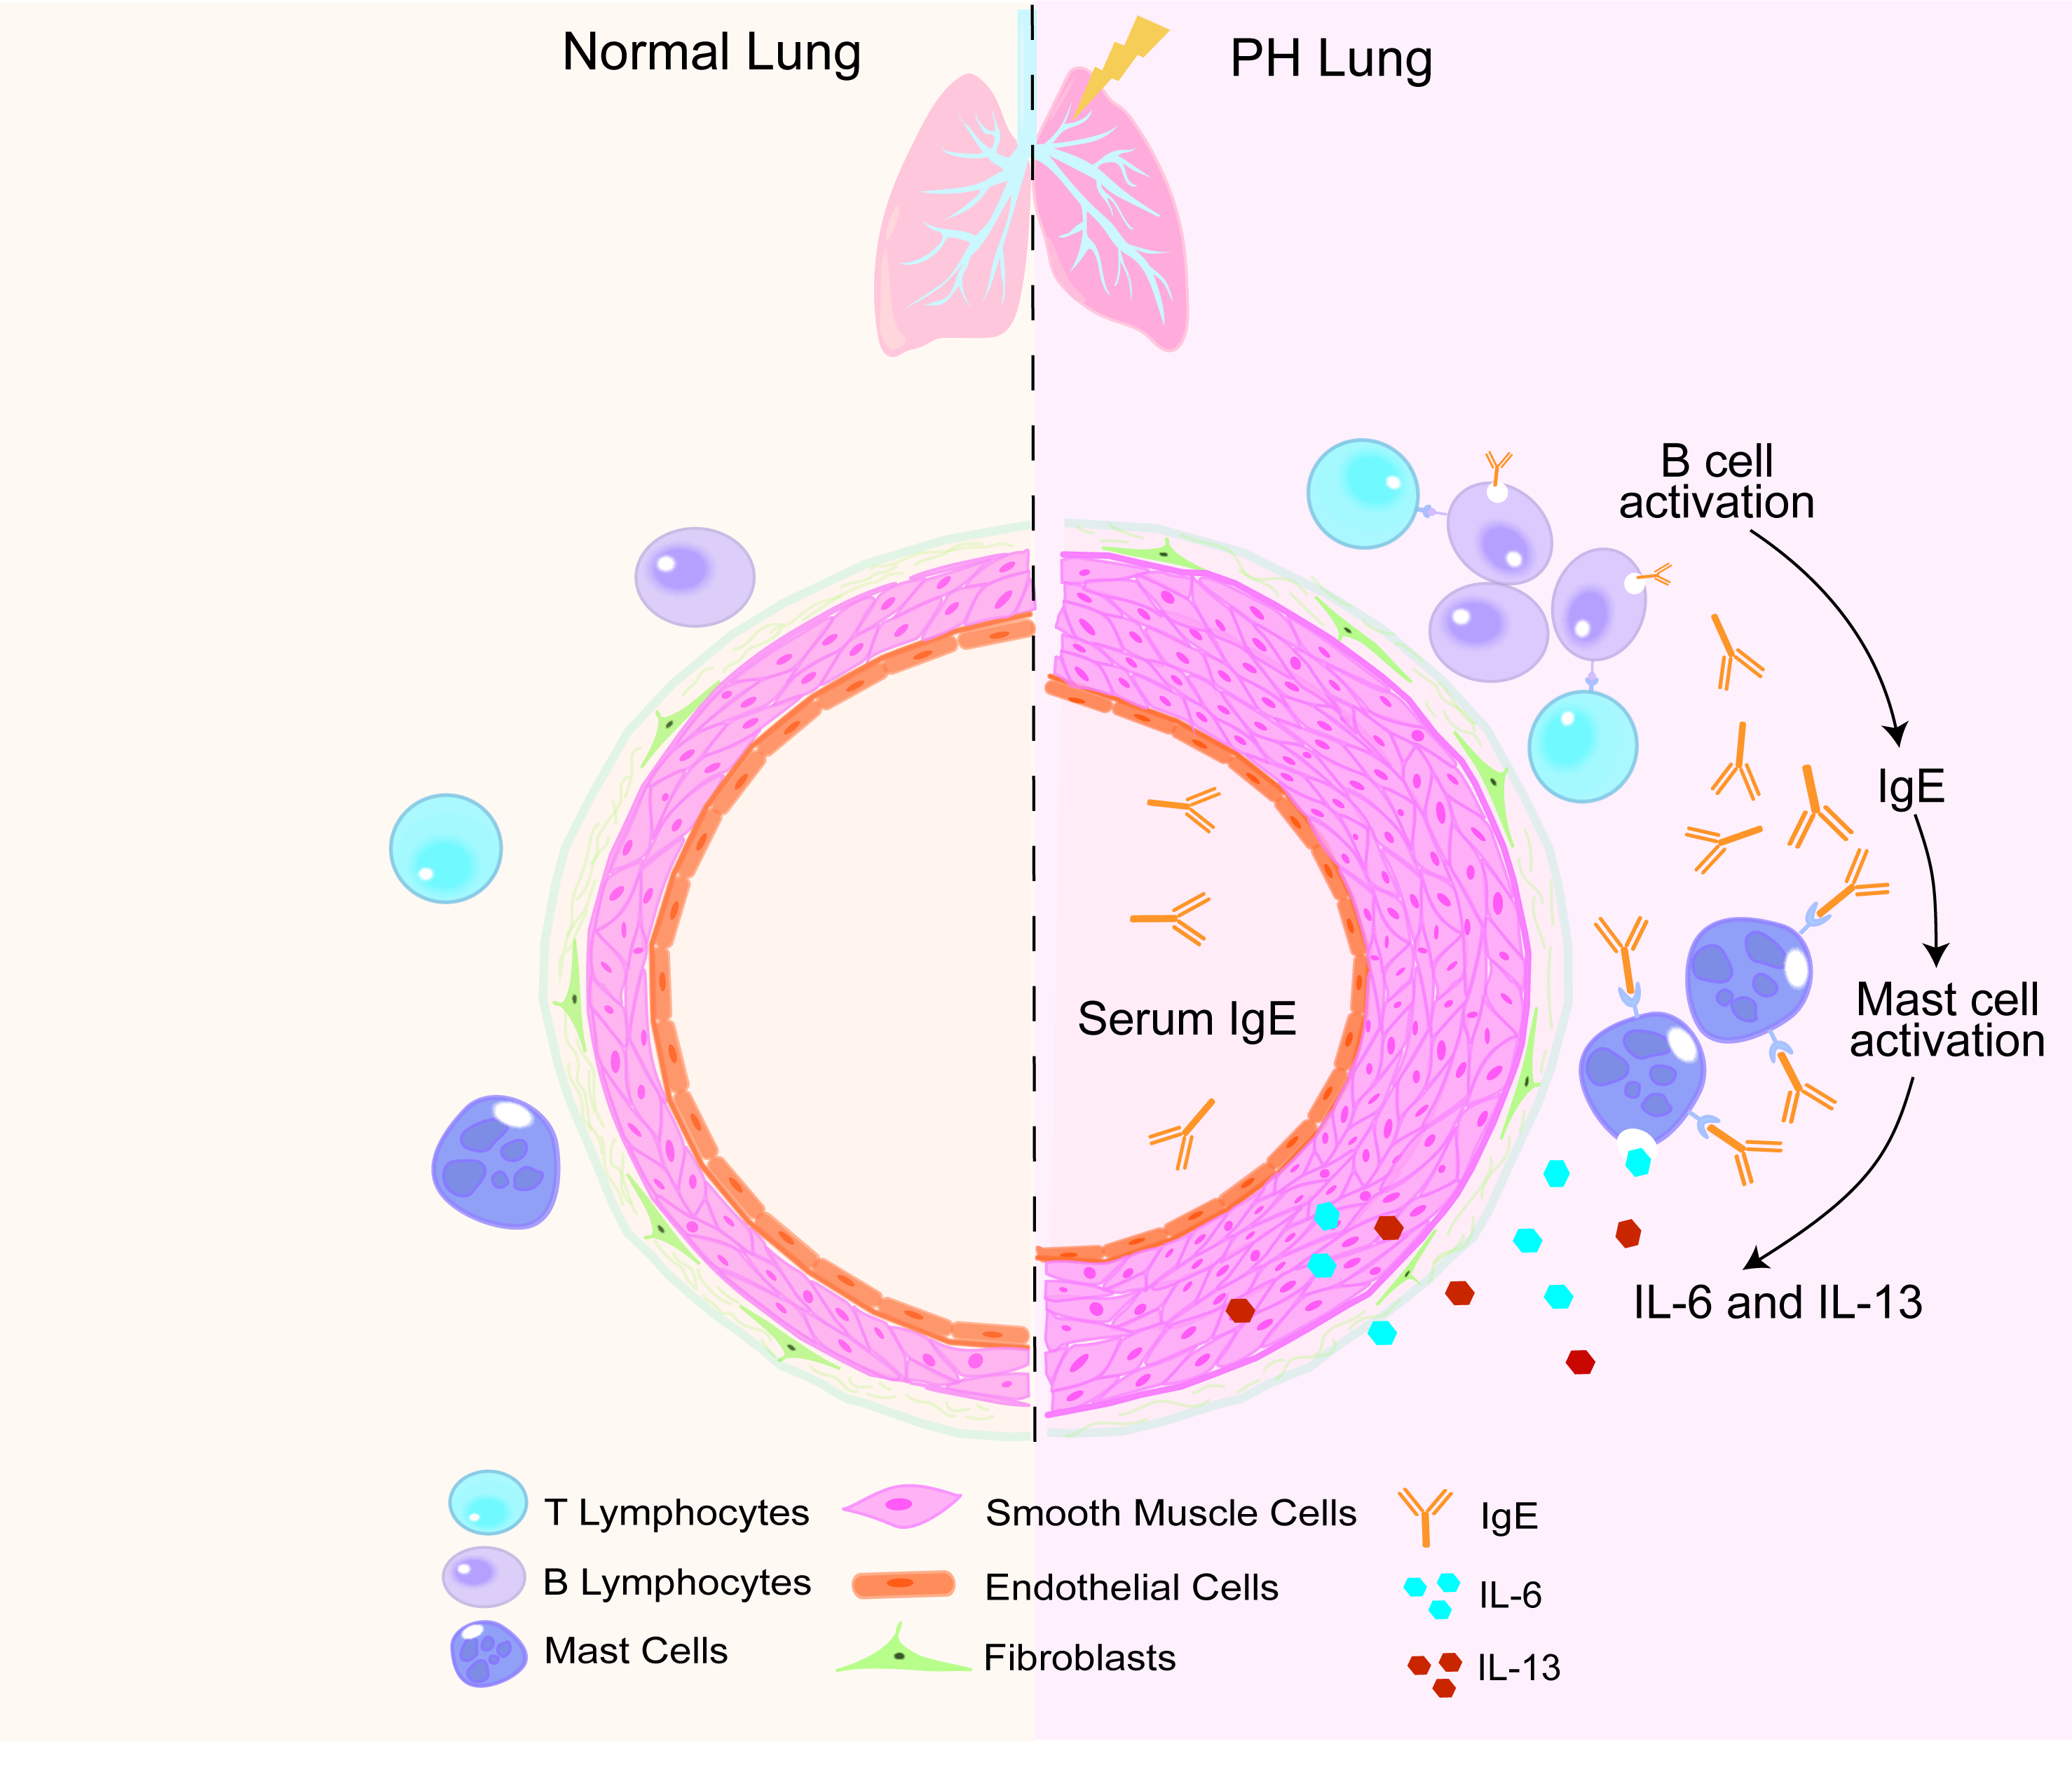


**Supplementary Figure 6. Graphical abstract.**
